# Supplementary material
Source: publisher figshare collection journal article supplement (https://acs.figshare.com/ndownloader/files/25989506)
Supplement: Supplementary file 1 [file 25989506]

Compound #	SMILES	AcTub (1 uM) relative to untreated control	AcTub (1 uM) relative to positive control	AcTub (10 uM) relative to untreated control	AcTub (10 uM) relative to positive control	α-Tubulin (1 uM)	α-Tubulin (10 uM)	Class	logD(7.4)	MT-stabilizing activity in QBI293 (average activity at 1 and 10 uM normalized to positive cntrl.)	ΔG_Bind	QSAR_predicted_Activity
3	ClC1=NC2=NC=NN2C(N[C@@H](C(C)C)C)=C1C3=C(C=C(C=C3F)F)F	2.14 ± 0.15	0.59	2.57 ± 0.15	0.71	1.10 ± 0.17	0.90 ± 0.16	I	3.51	-0.18	-69.94	-0.3
6	ClC1=NC2=NC=NN2C(N[C@H](C(F)(F)F)C)=C1C3=C(C=C(C=C3F)OCCCN(C)C)F	13.2 ± 1.8	1.28	1.92 ± 0.14	0.19	0.74 ± 0.05	0.40 ± 0.01	II
7	ClC1=NC2=NC=NN2C(N[C@H](C(F)(F)F)C)=C1C3=C(C=C(C=C3F)F)F	2.78 ± 0.17	0.45	5.04 ± 0.45	0.82	1.18 ± 0.09	1.22 ± 0.18	I		-0.2	-63.45	-0.4
8	ClC1=NC2=NC=NN2C(N[C@H](C(F)(F)F)C)=C1C3=CC=CC=C3	1.11 ± 0.04	0.12	2.07 ± 0.10	0.3	1.09 ± 0.03	1.03 ± 0.02	I		-0.77	-56.23	-0.9
9	ClC1=NC2=NC=NN2C(N[C@H](C(F)(F)F)C)=C1C3=CC=C(F)C=C3	1.05 ± 0.05	0.07	2.41 ± 0.13	0.16	1.04 ± 0.06	1.13 ± 0.06	I		-0.94	-56.6	-1
10	ClC1=NC2=NC=NN2C(N[C@H](C(F)(F)F)C)=C1C3=C(F)C=CC=C3	1.73 ± 0.02	0.13	3.56 ± 0.08	0.16	1.04 ± 0.06	1.13 ± 0.06	I		-0.7	-59.2	-0.6
11	ClC1=NC2=NC=NN2C(N[C@H](C(F)(F)F)C)=C1C3=C(F)C=C(F)C=C3	1.54 ± 0.05	0.13	3.56 ± 0.08	0.26	1.09 ± 0.01	1.05 ± 0.06	I		-0.7	-56.3	-0.6
12	ClC1=NC2=NC=NN2C(N[C@H](C(F)(F)F)C)=C1C3=C(F)C=CC=C3F	2.20 ± 0.13	0.16	5.28 ± 0.54	0.39	1.06 ± 0.14	1.02 ± 0.04	I		-0.56	-60.74	-0.3
13	ClC1=NC2=NC=NN2C(N[C@H](C(F)(F)F)C)=C1C3=CC(F)=CC(F)=C3	1.52 ± 0.074	0.12	3.97 ± 0.82	0.3	1.12 ± 0.13	1.12 ± 0.02	I		-0.68	-54.71	-0.7
14	ClC1=NC2=NC=NN2C(N[C@H](C(F)(F)F)C)=C1C3=C(F)C=CC(F)=C3	1.40 ± 0.38	0.07	4.10 ± 0.44	0.22	1.05 ± 0.11	0.90 ± 0.06	I		-0.83	-58.55	-0.8
15	ClC1=NC2=NC=NN2C(N[C@H](C(F)(F)F)C)=C1C3=CC=C(F)C(F)=C3	1.85 ± 0.09	0.05	4.76 ± 0.62	0.12	1.01 ± 0.08	1.13 ± 0.06	I		-1.07	-55.88	-0.9
16	ClC1=NC2=NC=NN2C(N[C@H](C(F)(F)F)C)=C1C3=CC=C(F)C(F)=C3F	1.50 ± 0.03	0.12	4.28 ± 0.33	0.34	1.11 ± 0.05	0.88 ± 0.04	I		-0.64	-57.66	-0.6
17	ClC1=NC2=NC=NN2C(N[C@H](C(F)(F)F)C)=C1CC3=C(F)C=C(F)C=C3F	1.26 ± 0.06	0.09	1.43 ± 0.02	0.1	1.01 ± 0.07	1.05 ± 0.04	NA		-1.01	-49.7474	-0.6
18	ClC1=NC2=NC=NN2C(N[C@H](C(F)(F)F)C)=C1C3=C(C=C(C=C3F)C)F	1.62 ± 0.18	0.28	2.73 ± 0.18	0.48	0.99 ± 0.09	0.78 ± 0.07	II
19	ClC1=NC2=NC=NN2C(N[C@H](C(F)(F)F)C)=C1C3=C(C=C(C=C3F)C(F)(F)F)F	1.09 ± 0.04	0.13	1.39 ± 0.11	0.16	1.06 ± 0.02	1.02 ± 0.03	I		-0.83	-50.75297	-0.4
20	ClC1=NC2=NC=NN2C(N[C@H](C(F)(F)F)C)=C1C3=C(C=C(C=C3F)C#N)F	1.90 ± 0.06	0.27	3.56 ± 0.31	0.51	0.94 ± 0.02	0.95 ± 0.05	I		-0.41	-64.8623	-0.1
21	ClC1=NC2=NC=NN2C(N[C@H](C(F)(F)F)C)=C1C3=C(C=C(C=C3F)Cl)F	1.88 ± 0.03	0.31	4.28 ± 0.17	0.7	0.93 ± 0.02	0.81 ± 0.06	II
22	ClC1=NC2=NC=NN2C(N[C@H](C(F)(F)F)C)=C1C3=C(C=C(C=C3F)[N+]([O-])=O)F	3.24 ± 0.36	0.6	6.65 ± 0.45	1.23	0.96 ± 0.01	0.94 ± 0.05	I		-0.04	-61.4473	-0.3
23	ClC1=NC2=NC=NN2C(N[C@H](C(F)(F)F)C)=C1C3=C(C=C(C=C3F)N)F	0.94 ± 0.27	0.17	0.69 ± 0.37	0.13	0.97 ± 0.03	0.96 ± 0.02	NA
24	ClC1=NC2=NC=NN2C(N[C@H](C(F)(F)F)C)=C1C3=C(C=C(C=C3F)OC)F	3.16 ± 0.29	0.64	2.07 ± 0.07	0.42	0.72 ± 0.09	0.51 ± 0.05	II
25	ClC1=NC2=NC=NN2C(N[C@H](C(F)(F)F)C)=C1C3=C(C=C(C=C3F)SCCCN(C)C)F	3.90 ± 0.66	0.9	1.49 ± 0.48	0.34	0.83 ± 0.05	1.07 ± 0.02	II
26	ClC1=NC2=NC=NN2C(N[C@H](C(F)(F)F)C)=C1C3=C(C=C(C=C3F)S(CCCN(C)C)=O)F	1.49 ± 0.48	0.34	1.39 ± 0.11	0.32	1.22 ± 0.06	0.98 ± 0.24	NA
27	ClC1=NC2=NC=NN2C(N[C@H](C(F)(F)F)C)=C1C3=C(C=C(C=C3F)S(CCCN(C)C)(=O)=O)F	1.13 ± 0.10	0.24	1.08 ± 0.11	0.23	0.70 ± 0.58	1.07 ± 0.07	NA
28	ClC1=NC2=NC=NN2C(N[C@H](C(F)(F)F)C)=C1C3=C(C=C(C=C3F)SC)F	1.75 ± 0.37	0.27	2.23 ± 0.15	0.35	0.88 ± 0.05	0.56 ± 0.06	II
29	ClC1=NC2=NC=NN2C(N[C@H](C(F)(F)F)C)=C1C3=C(C=C(C=C3F)S(C)=O)F	0.84 ± 0.21	0.21	0.87 ± 0.21	0.21	0.96 ± 0.02	0.93 ± 0.03	NA
30	ClC1=NC2=NC=NN2C(N[C@H](C(F)(F)F)C)=C1C3=C(C=C(C=C3F)S(C)(=O)=O)F	1.21 ± 0.38	0.19	1.23 ± 0.37	0.19	1.03 ± 0.02	1.02 ± 0.04	NA
31	ClC1=NC2=NC=NN2C(N[C@H](C(F)(F)F)C)=C1C3=C(C=C(C=C3F)OCCCO)F	7.25 ± 0.23	1.34	1.33 ± 0.15	0.25	0.73 ± 0.06	0.37 ±0.02	II
33	ClC1=NC2=NC=NN2C(N[C@H](C(F)(F)F)C)=C1C3=C(C=C(C=C3F)O)F	1.22 ± 0.73	0.23	4.11 ± 0.76	0.77	0.84 ± 0.07	0.57 ± 0.02	II
34	ClC1=NC2=NC=NN2C(N)=C1C3=C(C=C(C=C3F)F)F	1.18 ± 0.01	0.09	1.12 ± 0.08	0.08	1.08 ± 0.07	1.05 ± 0.02	NA		-1.08	-48.52385	-1.1
35	ClC1=NC2=NC=NN2C(NC(C)C)=C1C3=C(C=C(C=C3F)F)F	1.15 ± 0.15	0.15	2.01 ± 0.17	0.27	0.92 ± 0.10	0.98 ± 0.03	I		-0.68	-61.7642	-0.7
36	ClC1=NC2=NC=NN2C(NCCC)=C1C3=C(C=C(C=C3F)F)F	1.15 ± 0.07	0.27	1.14 ± 0.14	0.26	1.14 ± 0.23	0.86 ± 0.24	NA		-0.58	-60.41815	-0.7
37	ClC1=NC2=NC=NN2C(NCC(C)C)=C1C3=C(C=C(C=C3F)F)F	1.63 ± 0.14	0.38	2.28 ± 0.17	0.53	1.30 ± 0.04	0.99 ± 0.25	I		-0.35	-63.42376	-0.6
38	ClC1=NC2=NC=NN2C(O)=C1C3=C(C=C(C=C3F)F)F	1.04 ± 0.04	0.17	1.03 ± 0.08	0.17	1.06 ± 0.03	1.02 ± 0.05	NA
39	ClC1=NC2=NC=NN2C(NC(C(C)C)=O)=C1C3=C(C=C(C=C3F)F)F	1.09 ± 0.01	0.07	1.31 ± 0.47	0.09	1.00 ± 0.03	0.97 ± 0.07	NA		-1.09	-65.0659	-1.1
40	ClC1=NC2=NC=NN2C(NC3=CC=CC=C3)=C1C4=C(C=C(C=C4F)F)F	1.14 ± 0.26	0.09	1.05 ± 0.06	0.08	1.10 ± 0.17	0.96 ± 0.01	NA
41	ClC1=NC2=NC=NN2C(NCC3=CC=CC=C3)=C1C4=C(C=C(C=C4F)F)F	1.05 ± 0.16	0.16	1.49 ± 0.04	0.22	1.00 ± 0.12	1.06 ± 0.06	I		-0.73	-65.0872	-0.8
42	ClC1=NC2=NC=NN2C(OC(C(F)(F)F)C)=C1C3=C(C=C(C=C3F)F)F	0.91 ± 0.04	0.19	1.01 ± 0.07	0.21	1.03 ± 0.04	1.04 ± 0.05	NA
43	ClC1=NC2=NC=NN2C(NC(C([H])(F)F)C)=C1C3=C(C=C(C=C3F)F)F	1.28 ± 0.09	0.3	1.82 ± 0.10	0.35	1.19 ± 0.13	1.17 ± 0.01	I		-0.45	-60.6938	-0.4
44	ClC1=NC2=NC=NN2C(NC(C([H])(F)[H])C)=C1C3=C(C=C(C=C3F)F)F	1.32 ± 0.26	0.3	1.50 ± 0.09	0.35	0.92 ± 0.12	1.09 ± 0.03	I		-0.49	-60.5993	-0.6
45	ClC1=NC2=NC=NN2C(N[C@@H](C)C(C)C)=C1C3=C(C=C(C=C3F)F)F	1.32 ± 0.14	0.06	3.49 ± 0.07	0.15	0.95 ± 0.01	0.89 ± 0.01	I		-0.98	-55.6505	-0.8
46	ClC1=NC2=NC=NN2C(N[C@H](C(F)(F)F)C(C)C)=C1C3=C(C=C(C=C3F)F)F	3.12 ± 0.25	0.17	6.78 ± 0.18	0.38	1.04 ± 0.01	1.06 ± 0.01	I		-0.56	-61.6044	-0.6
47	ClC1=NC2=NC=NN2C(N[C@@H](C(F)(F)F)C(C)C)=C1C3=C(C=C(C=C3F)F)F	2.79 ± 0.04	0.16	13.0 ± 0.54	0.73	1.10 ± 0.09	0.61 ± 0.02	II
48	ClC1=NC2=NC=NN2C(N[C@@H](C(F)(F)F)C)=C1C3=C(C=C(C=C3F)F)F	1.39 ± 0.11	0.24	2.47 ± 0.10	0.43	1.23 ± 0.21	1.47 ± 0.06	I		-0.47	-64.8173	-0.4
49	ClC1=NC2=NC=NN2C(N3CCC3)=C1C4=C(C=C(C=C4F)F)F	0.98 ± 0.07	0.26	1.22 ± 0.02	0.32	0.96 ± 0.07	1.17 ± 0.05	I		-0.54	-58.5743	-0.7
50	ClC1=NC2=NC=NN2C(N3CCCC3)=C1C4=C(C=C(C=C4F)F)F	1.14 ± 0.37	0.07	2.74 ± 0.23	0.16	1.12 ± 0.31	1.18 ± 0.10	I		-0.96	-53.9318	-0.8
51	ClC1=NC2=NC=NN2C(N3CCCCC3)=C1C4=C(C=C(C=C4F)F)F	2.21 ± 0.36	0.13	5.84 ± 1.38	0.33	1.23 ± 0.05	1.20 ± 0.22	I		-0.64	-68.8712	-0.7
52	ClC1=NC2=NC=NN2C(N3CCCCCC3)=C1C4=C(C=C(C=C4F)F)F	4.16 ± 0.97	0.45	6.87 ± 0.04	0.74	0.99 ± 0.03	0.99 ± 0.04	I	3.38	-0.22	-71.7903	-0.2
53	ClC1=NC2=NC=NN2C(N3CCCCCCC3)=C1C4=C(C=C(C=C4F)F)F	3.70 ± 0.32	0.36	7.16 ± 0.11	0.7	1.01 ± 0.14	1.28 ± 0.03	I		-0.28	-63.7075	-0.2
54	ClC1=NC2=NC=NN2C(N3[C@@H]4CC[C@H]3C[C@@H](OC)C4)=C1C5=C(C=C(C=C5F)F)F	3.65 ± 0.15	0.54	7.43 ± 0.93	1.11	1.12 ± 0.08	1.38 ± 0.19	I	3.38	-0.08	-67.8712	-0.2
55	ClC1=NC2=NC=NN2C(NC3CC3)=C1C4=C(C=C(C=C4F)F)F	1.17 ± 0.15	0.07	1.27 ± 0.06	0.07	1.20 ± 0.03	1.26 ± 0.03	NA		-1.16	-59.8904	-0.9
56	ClC1=NC2=NC=NN2C(NC3CCC3)=C1C4=C(C=C(C=C4F)F)F	0.97 ± 0.15	0.13	1.75 ± 0.03	0.23	0.94 ± 0.01	0.95 ± 0.02	I		-0.75	-62.998	-0.7
57	ClC1=NC2=NC=NN2C(NC3CCCC3)=C1C4=C(C=C(C=C4F)F)F	2.03 ± 0.04	0.27	4.83 ± 0.04	0.45	1.03 ± 0.02	0.98 ± 0.02	I		-0.35	-65.9196	-0.4
58	ClC1=NC2=NC=NN2C(NC3CCCCC3)=C1C4=C(C=C(C=C4F)F)F	1.13 ± 0.11	0.07	3.51 ± 0.19	0.23	1.07 ± 0.05	0.99 ± 0.05	I		-0.83	-65.9196	-0.8
59	ClC1=NC2=NC=NN2C(NCC(C)(C)C)=C1C3=C(C=C(C=C3F)F)F	2.04 ± 0.11	0.3	4.79 ± 0.74	0.71	1.03 ± 0.07	1.06 ± 0.08	I		-0.29	-66.8532	-0.4
60	ClC1=NC2=NC=NN2C(N[C@H](C)C(C)(C)C)=C1C3=C(C=C(C=C3F)F)F	5.70 ± 0.27	0.56	8.42 ± 0.20	0.83	0.97 ± 0.02	1.08 ± 0.03	I	3.45	-0.16	-66.17	-0.2
61	ClC1=NC2=NC=NN2C(N[C@@H](C)C(C)(C)C)=C1C3=C(C=C(C=C3F)F)F	3.36 ± 0.13^	0.43^	4.29 ± 0.04 ^^	0.55^^	1.08 ± 0.05 ^	1.22 ± 0.03 ^^	I		-0.37	-73.414	-0.3
62	ClC1=NC2=NC=NN2C(CC(C)C(F)(F)F)=C1C3=C(C=C(C=C3F)F)F	2.30 ± 0.59	0.53	2.29 ± 0.38	0.53	1.03 ± 0.07	0.78 ± 0.05	II
63	ClC1=NC2=NC=NN2C(N[C@@H](C)C(F)(F)F)=C1C3=C(F)C=C(C#N)C=C3	2.01 ± 0.38	0.37	3.64 ± 0.26	0.67	1.00 ± 0.01	1.00 ± 0.01	I		-0.28	-64.6209	-0.3
64	ClC1=NC2=NC=NN2C(N[C@H](C)C(C)C)=C1C3=C(F)C=CC=C3F	4.36 ± 0.72	0.96	4.88 ± 0.72	1.07	1.00 ± 0.02	0.96 ± 0.01	I	3.16	0.01	-65.4648	-0.1
65	ClC1=NC2=NC=NN2C(N[C@H](C)C(C)C)=C1C3=C(F)C=CC=C3	0.95 ± 0.26	0.2	2.10 ± 0.31	0.43	1.00 ± 0.04	1.04 ± 0.07	I	2.95	-0.5	-68.3442	-0.6
66	ClC1=NC2=NC=NN2C(N[C@H](C)C(C)C)=C1C3=C(F)C=C(C#N)C=C3F	3.80 ± 0.15	0.62	4.28 ± 0.14	0.69	0.93 ± 0.02	0.94 ± 0.02	I	2.47	-0.18	-62.0901	-0.1
67	ClC1=NC2=NC=NN2C(N[C@@H](C(C)C)C)=[C@]1[c@]3ccc(C#N)cc3F	2.79 ± 1.11	0.61	3.42 ± 0.55	0.75	0.99 ± 0.02	0.93 ± 0.02	I	2.9	-0.17	-65.6786	-0.2
68	ClC1=NC2=NC=NN2C(N[C@@H](C(C)C)C)=C1c3c(F)cc(C#N)cc3	2.15 ± 0.36	0.47	2.29 ± 0.30	0.5	0.95 ± 0.02	0.92 ± 0.01	I	2.67	-0.31	-62.4089	-0.2
69	ClC1=NC2=NC=NN2C(N[C@H](C)C(C)(C)C)=C1C3=C(F)C=C(C#N)C=C3F	2.83 ± 0.33	0.68	4.60 ± 0.35	1.1	0.98 ± 0.03	1.03 ± 0.03	I	2.35	-0.05	-62.4089	0.1
70	ClC1=NC2=NC=NN2C(N[C@H](C)C(C)(C)C)=C1C3=C(F)C=C(C#N)C=C3	4.41 ± 0.27	0.71	7.67 ± 0.70	1.24	0.86 ± 0.03	0.93 ± 0.08	I	2.86	-0.01	-66.6196	-0.1
71	ClC1=NC2=NC=NN2C(N3[C@@H]4CC[C@H]3C[C@@H](OC)C4)=C1C5=C(F)C=C(C#N)C=C5F	2.61 ± 0.26	0.64	4.32 ± 0.29	1.06	0.99 ± 0.01	1.00 ± 0.03	I	2.74	-0.07	-66.40054	0
72	ClC1=NC2=NC=NN2C(N3CCCCCC3)=C1C4=C(F)C=C(C#N)C=C4F	6.40 ± 0.61	1.04	11.2 ± 0.77	1.82	0.98 ± 0.03	0.99 ± 0.02	I	2.12	0.15	-73.4187	0.1
73	ClC1=NC2=NC=NN2C(N3CCCCCC3)=C1C4=C(F)C=C(C#N)C=C4	7.17 ± 1.09	0.55	12.6 ± 2.8	0.97	1.04 ± 0.05	0.99 ± 0.03	I	3.15	-0.12	-70.09312	-0.1
74	ClC1=NC2=NC=NN2C(N3CCCCCCC3)=C1C4=C(F)C=C(C#N)C=C4F	3.24 ± 0.80	0.58	4.40 ± 0.34	0.79	1.01 ± 0.02	0.99 ± 0.02	I		-0.16	-66.1398	-0.1
75	ClC1=NC2=NC=NN2C(N3CCCCCCC3)=C1C4=C(F)C=C(C#N)C=C4	1.09 ± 0.22	0.22	2.89 ± 0.56	0.59	0.97 ± 0.02	0.95 ± 0.07	I		-0.39	-58.0681	-0.4
^ compound tested at 10 in the AcTub assay
^^ compound tested at 30 in the AcTub assay
